# Supplementary material for: When do persuasive messages on vaccine safety steer COVID-19 vaccine acceptance and recommendations? Behavioural insights from a randomised controlled experiment in Malaysia
Source: PubMed Central journal article supplement — BMJ Glob Health. 2022 Jul 29;7(7):e009250. doi: 10.1136/bmjgh-2022-009250 (PMC9344599; doi:10.1136/bmjgh-2022-009250), 2022-07-29
Supplement: bmjgh-2022-009250supp001.pdf [file bmjgh-2022-009250supp001.pdf]

## Supplementary material

When do persuasive messages on vaccine safety steer COVID-19 vaccine acceptance and recommendations? Behavioural insights from a randomised controlled experiment in Malaysia.

### Methods

#### Study setting during recruitment period

Malaysia was experiencing a surge of infections in April 2021, with over 3,300 daily cases and almost 1,500 total deaths reported at the start of our experiment.[1] By the end of our experiment, daily cases steadily increased to reach a peak of over 7,700 cases, with cumulative deaths standing at 3,378.[2] Malaysia's COVID-19 immunisation programme was initiated at the end of February 2021.[3] Our experiment coincided closely with the second and third phase of the programme which began in April and May 2021 respectively. These two phases were targeted at the general adult population.

#### Stratified sampling

Malaysia is composed of several major ethnicities. Bumiputera, which consist of Malays and the indigenous people of Malaysia, accounted for about 70% of the population.[4] This is followed by Chinese ( $\approx 23\%$ ) and Indians ( $\approx 7\%$ ). The sex ratio among Malaysian citizens stands at 102 males per 100 females. There is a sizable proportion of young Malaysian in the country, with approximately 53% of the total adult population aged between 18 to 39 years. Middle age (40 to 59 years old) and the elderly accounted for approximately 31% and 16% of the population respectively. In terms of household income, Malaysia categorizes citizens into three distinct groups; Bottom 40% (B40), Middle 40% (M40) and Top 20% (T20).[5] These categorisations represent percentages of the country's population in terms of household

income ranging from the bottom 40% to the top 20%. Except for age, stratified recruitment was conducted according to approximate national ratios for sex, ethnicity, and household income. Due to our survey panel's limitation to sample for older participants, we inflated and deflated the target sampling proportion for the younger and older age group by about 10% and 12% respectively.

### Message design

Messages were designed with a standardised dimension of 1080 x 1350 pixels in order to look similar with messages commonly found on social media posts and is conveniently displayed on computer monitors or smartphones. Font sizes used for all messages were standardised. Numbers or words which indicated a numerical or statistical meaning were printed using yellow colour fonts that were slightly enlarged to draw extra attention. The last sentence in the rally slogan; "It's safe and effective!", was printed in a green font to psychologically invoke feelings of safety about the vaccine.[6]

### References:

1. Ashman A. Malaysia's new Covid-19 cases rise to 3,332 as minister Saifuddin also infected. *Malay Mail*. 2021 Apr 29;
2. Bernama. Latest count of Covid-19 cases in Malaysia and selected countries. *The Malaysian Reserve*. 2021 Jun 7;
3. Ahmad R, Pfordten D, Koh W. INTERACTIVE: How is Malaysia's Covid-19 vaccination plan progressing? Find out here. *The Star*. 2021 Mar 12;
4. Department of Statistics Malaysia. Current population estimates, Malaysia 2020. 2020.
5. Household Income & Basic Amenities Survey Report 2019. Department of Statistics Malaysia Official Portal. 2022.  
[https://www.dosm.gov.my/v1/index.php?r=column/cthemByCat&cat=120&bul\\_id=TU00TmRhQ1N5TUxHVWN0T2VjbXJYZz09&menu\\_id=amVoWU54UTI0a21NWmdhMjFMMWcyZz09](https://www.dosm.gov.my/v1/index.php?r=column/cthemByCat&cat=120&bul_id=TU00TmRhQ1N5TUxHVWN0T2VjbXJYZz09&menu_id=amVoWU54UTI0a21NWmdhMjFMMWcyZz09) (accessed 27 Feb 2021).
6. Cherry K. How Does the Color Green Make You Feel?. *Verywell Mind*. 2022.  
<https://www.verywellmind.com/color-psychology-green-2795817> (accessed 20 Mar 2022).

**Table S1: Baseline characteristics of survey participants stratified according to experimental arms**

|                               |                    | DN (70%)        | DN              | HCW             | NF              | PF              | RC(S)           | RC(SE)          | Control         | DN(70%) + DN    | DN(70%) + HCW   | DN(70%) + NF    | DN(70%) + PF    | DN(70%) + RC(S) | DN(70%) + RC(SE) | T-test/Chi square P-value |
|-------------------------------|--------------------|-----------------|-----------------|-----------------|-----------------|-----------------|-----------------|-----------------|-----------------|-----------------|-----------------|-----------------|-----------------|-----------------|------------------|---------------------------|
|                               |                    | Mean±SD or N(%)  |                           |
| Age                           |                    | 37±11.6         | 36±11.9         | 36±11.8         | 36±11.5         | 36±11.9         | 35±11.3         | 36±11.7         | 36±11.6         | 36±11.7         | 36±11.9         | 36±11.8         | 36±11.4         | 36±11.9         | 36±11.6          | 0.999                     |
| Sex                           | Male               | 210 (50.6)      | 203 (49.4)      | 206 (50.2)      | 206 (49.8)      | 208 (50.2)      | 210 (50.5)      | 205 (50.0)      | 207 (50.5)      | 211 (50.8)      | 207 (49.8)      | 207 (50.1)      | 211 (50.8)      | 211 (50.8)      | 205 (50.0)       | 1.000                     |
| Education level               | Tertiary education | 194(46.7)       | 218(53.0)       | 205(50.0)       | 209(50.5)       | 182(44.0)       | 198(47.6)       | 200(48.8)       | 217(52.9)       | 194(46.7)       | 225(54.1)       | 209(50.6)       | 204(49.2)       | 215(51.8)       | 195(47.6)        | 0.169                     |
| Intent to vaccinate           | Definitely not     | 5(1.2)          | 8(1.9)          | 8(2.0)          | 9(2.2)          | 9(2.2)          | 7(1.7)          | 8(2.0)          | 5(1.2)          | 7(1.7)          | 9(2.2)          | 7(1.7)          | 9(2.2)          | 11(2.7)         | 4(1.0)           | 0.968                     |
|                               | Probably not       | 32(7.7)         | 28(6.8)         | 25(6.1)         | 28(6.8)         | 26(6.3)         | 29(7.0)         | 30(7.3)         | 32(7.8)         | 34(8.2)         | 33(7.9)         | 20(4.8)         | 29(7.0)         | 27(6.5)         | 17(4.1)          |                           |
|                               | Probably yes       | 123(29.6)       | 118(28.7)       | 119(29.0)       | 120(29.0)       | 133(32.1)       | 133(32.0)       | 121(29.5)       | 111(27.1)       | 129(31.1)       | 122(29.3)       | 116(28.1)       | 132(31.8)       | 123(29.6)       | 124(30.2)        |                           |
|                               | Definitely yes     | 255(61.4)       | 257(62.5)       | 258(62.9)       | 257(62.1)       | 246(59.4)       | 247(59.4)       | 251(61.2)       | 262(63.9)       | 245(59.0)       | 252(60.6)       | 270(65.4)       | 245(59.0)       | 254(61.2)       | 265(64.6)        |                           |
| Intent to recommend:          |                    |                 |                 |                 |                 |                 |                 |                 |                 |                 |                 |                 |                 |                 |                  |                           |
| Healthy adults                | Strongly disagree  | 8(1.9)          | 8(1.9)          | 5(1.2)          | 7(1.7)          | 6(1.4)          | 7(1.7)          | 7(1.7)          | 6(1.5)          | 7(1.7)          | 5(1.2)          | 8(1.9)          | 5(1.2)          | 5(1.2)          | 3(0.7)           | 0.920                     |
|                               | Disagree           | 15(3.6)         | 11(2.7)         | 11(2.7)         | 9(2.2)          | 13(3.1)         | 10(2.4)         | 18(4.4)         | 8(2.0)          | 12(2.9)         | 22(5.3)         | 13(3.1)         | 17(4.1)         | 17(4.1)         | 9(2.2)           |                           |
|                               | Not sure           | 46(11.1)        | 42(10.2)        | 43(10.5)        | 53(12.8)        | 49(11.8)        | 37(8.9)         | 43(10.5)        | 36(8.8)         | 48(11.6)        | 40(9.6)         | 37(9.0)         | 49(11.8)        | 42(10.1)        | 40(9.8)          |                           |
|                               | Agree              | 198(47.7)       | 202(49.1)       | 183(44.6)       | 198(47.8)       | 204(49.3)       | 210(50.5)       | 195(47.6)       | 206(50.2)       | 204(49.2)       | 214(51.4)       | 213(51.6)       | 201(48.4)       | 196(47.2)       | 209(51.0)        |                           |
|                               | Strongly agree     | 148(35.7)       | 148(36.0)       | 168(41.0)       | 147(35.5)       | 142(34.3)       | 152(36.5)       | 147(35.9)       | 154(37.6)       | 144(34.7)       | 135(32.5)       | 142(34.4)       | 143(34.5)       | 155(37.3)       | 149(36.3)        |                           |
| Elderly                       | Strongly disagree  | 11(2.7)         | 10(2.4)         | 12(2.9)         | 11(2.7)         | 9(2.2)          | 11(2.6)         | 13(3.2)         | 13(3.2)         | 11(2.7)         | 18(4.3)         | 8(1.9)          | 13(3.1)         | 19(4.6)         | 9(2.2)           | 0.622                     |
|                               | Disagree           | 36(8.7)         | 28(6.8)         | 23(5.6)         | 27(6.5)         | 28(6.8)         | 28(6.7)         | 30(7.3)         | 25(6.1)         | 26(6.3)         | 35(8.4)         | 16(3.9)         | 24(5.8)         | 20(4.8)         | 26(6.3)          |                           |
|                               | Not sure           | 68(16.4)        | 75(18.2)        | 69(16.8)        | 78(18.8)        | 79(19.1)        | 76(18.3)        | 73(17.8)        | 64(15.6)        | 96(23.1)        | 80(19.2)        | 72(17.4)        | 79(19.0)        | 61(14.7)        | 70(17.1)         |                           |
|                               | Agree              | 161(38.8)       | 164(39.9)       | 153(37.3)       | 156(37.7)       | 165(39.9)       | 169(40.6)       | 156(38.0)       | 182(44.4)       | 159(38.3)       | 156(37.5)       | 173(41.9)       | 165(39.8)       | 177(42.7)       | 167(40.7)        |                           |
|                               | Strongly agree     | 139(33.5)       | 134(32.6)       | 153(37.3)       | 142(34.3)       | 133(32.1)       | 132(31.7)       | 138(33.7)       | 126(30.7)       | 123(29.6)       | 127(30.5)       | 144(34.9)       | 134(32.3)       | 138(33.3)       | 138(33.7)        |                           |
| People with health conditions | Strongly disagree  | 15(3.6)         | 19(4.6)         | 20(4.9)         | 22(5.3)         | 18(4.3)         | 26(6.3)         | 24(5.9)         | 21(5.1)         | 18(4.3)         | 24(5.8)         | 19(4.6)         | 24(5.8)         | 26(6.3)         | 16(3.9)          | 0.941                     |
|                               | Disagree           | 63(15.2)        | 59(14.4)        | 40(9.8)         | 58(14.0)        | 55(13.3)        | 56(13.5)        | 60(14.6)        | 49(12.0)        | 58(14.0)        | 60(14.4)        | 49(11.9)        | 62(14.9)        | 46(11.1)        | 51(12.4)         |                           |
|                               | Not sure           | 128(30.8)       | 113(27.5)       | 121(29.5)       | 126(30.4)       | 133(32.1)       | 128(30.8)       | 119(29.0)       | 120(29.3)       | 131(31.6)       | 121(29.1)       | 120(29.1)       | 137(33.0)       | 124(29.9)       | 131(32.0)        |                           |
|                               | Agree              | 114(27.5)       | 120(29.2)       | 136(33.2)       | 110(26.6)       | 113(27.3)       | 103(24.8)       | 115(28.0)       | 128(31.2)       | 125(30.1)       | 123(29.6)       | 124(30.0)       | 110(26.5)       | 126(30.4)       | 124(30.2)        |                           |
|                               | Strongly agree     | 95(22.9)        | 100(24.3)       | 93(22.7)        | 98(23.7)        | 95(22.9)        | 103(24.8)       | 92(22.4)        | 92(22.4)        | 83(20.0)        | 88(21.2)        | 101(24.5)       | 82(19.8)        | 93(22.4)        | 88(21.5)         |                           |
| Negative vaccine attitude     | No                 | 272(65.5)       | 275(66.9)       | 266(64.9)       | 278(67.1)       | 267(64.5)       | 256(61.5)       | 261(63.7)       | 267(65.1)       | 273(65.8)       | 261(62.7)       | 281(68.0)       | 253(61.0)       | 266(64.1)       | 277(67.6)        | 0.603                     |

**Table S2: Average marginal effects for intention to accept the COVID-19 vaccine in each experimental arm relative to control arm**

|                | <b>Intention to vaccinate</b>                                     |
|----------------|-------------------------------------------------------------------|
|                | Marginal effects<br>[95% Confidence Interval]<br>Adjusted p-value |
| <b>DN(70%)</b> |                                                                   |
| Definitely no  | 0.00392<br>[-0.000780,0.00861]<br>0.598                           |
| Probably no    | 0.00516<br>[-0.00106,0.0114]<br>0.617                             |
| Probably yes   | 0.0163<br>[-0.00324,0.0359]<br>0.598                              |
| Definitely yes | -0.0254<br>[-0.0557,0.00484]<br>0.579                             |
| <b>DN</b>      |                                                                   |
| Definitely no  | -0.000924<br>[-0.00519,0.00334]<br>1.000                          |
| Probably no    | -0.00133<br>[-0.00745,0.00480]<br>1.000                           |
| Probably yes   | -0.00446<br>[-0.0250,0.0161]<br>1.000                             |
| Definitely yes | 0.00671<br>[-0.0242,0.0376]<br>1.000                              |
| <b>HCW</b>     |                                                                   |
| Definitely no  | 0.000472<br>[-0.00394,0.00488]<br>1.000                           |
| Probably no    | 0.000659<br>[-0.00550,0.00682]<br>1.000                           |
| Probably yes   | 0.00217<br>[-0.0182,0.0225]<br>1.000                              |
| Definitely yes | -0.00330<br>[-0.0342,0.0276]<br>1.000                             |
| <b>NF</b>      |                                                                   |
| Definitely no  | 0.00519*<br>[0.000312,0.0101]<br>0.317                            |

|                   |                                          |
|-------------------|------------------------------------------|
| Probably no       | 0.00671*<br>[0.000347,0.0131]<br>0.340   |
| Probably yes      | 0.0210*<br>[0.00134,0.0406]<br>0.306     |
| Definitely yes    | -0.0329*<br>[-0.0633,-0.00240]<br>0.284  |
| <hr/>             |                                          |
| <b>PF</b>         |                                          |
| Definitely no     | -0.000954<br>[-0.00517,0.00326]<br>1.000 |
| Probably no       | -0.00137<br>[-0.00742,0.00468]<br>1.000  |
| Probably yes      | -0.00461<br>[-0.0249,0.0157]<br>1.000    |
| Definitely yes    | 0.00693<br>[-0.0236,0.0375]<br>1.000     |
| <hr/>             |                                          |
| <b>RC(S)</b>      |                                          |
| Definitely no     | 0.000399<br>[-0.00393,0.00473]<br>1.000  |
| Probably no       | 0.000558<br>[-0.00550,0.00661]<br>1.000  |
| Probably yes      | 0.00184<br>[-0.0182,0.0219]<br>1.000     |
| Definitely yes    | -0.00280<br>[-0.0332,0.0276]<br>1.000    |
| <hr/>             |                                          |
| <b>RC(SE)</b>     |                                          |
| Definitely no     | 0.00139<br>[-0.00307,0.00585]<br>1.000   |
| Probably no       | 0.00191<br>[-0.00422,0.00804]<br>1.000   |
| Probably yes      | 0.00623<br>[-0.0138,0.0262]<br>1.000     |
| Definitely yes    | -0.00954<br>[-0.0401,0.0210]<br>1.000    |
| <hr/>             |                                          |
| <b>DN(70%)+DN</b> |                                          |

|                    |                                         |
|--------------------|-----------------------------------------|
| Definitely no      | 0.00161<br>[-0.00281,0.00603]<br>1.000  |
| Probably no        | 0.00220<br>[-0.00385,0.00825]<br>1.000  |
| Probably yes       | 0.00716<br>[-0.0126,0.0269]<br>1.000    |
| Definitely yes     | -0.0110<br>[-0.0411,0.0192]<br>1.000    |
| <hr/>              |                                         |
| <b>DN(70%)+HCW</b> |                                         |
| Definitely no      | 0.00158<br>[-0.00288,0.00603]<br>1.000  |
| Probably no        | 0.00216<br>[-0.00395,0.00826]<br>1.000  |
| Probably yes       | 0.00703<br>[-0.0128,0.0269]<br>1.000    |
| Definitely yes     | -0.0108<br>[-0.0412,0.0196]<br>1.000    |
| <hr/>              |                                         |
| <b>DN(70%)+NF</b>  |                                         |
| Definitely no      | 0.00565*<br>[0.000671,0.0106]<br>0.317  |
| Probably no        | 0.00726*<br>[0.000827,0.0137]<br>0.340  |
| Probably yes       | 0.0226*<br>[0.00288,0.0423]<br>0.306    |
| Definitely yes     | -0.0355*<br>[-0.0661,-0.00485]<br>0.284 |
| <hr/>              |                                         |
| <b>DN(70%)+PF</b>  |                                         |
| Definitely no      | 0.00241<br>[-0.00211,0.00693]<br>1.000  |
| Probably no        | 0.00325<br>[-0.00286,0.00936]<br>1.000  |
| Probably yes       | 0.0105<br>[-0.00922,0.0302]<br>1.000    |

|                       |                                         |
|-----------------------|-----------------------------------------|
| Definitely yes        | -0.0161<br>[-0.0464,0.0141]<br>1.000    |
| <hr/>                 |                                         |
| <b>DN(70%)+RC(S)</b>  |                                         |
| Definitely no         | 0.000300<br>[-0.00407,0.00467]<br>1.000 |
| Probably no           | 0.000420<br>[-0.00571,0.00655]<br>1.000 |
| Probably yes          | 0.00139<br>[-0.0189,0.0217]<br>1.000    |
| Definitely yes        | -0.00211<br>[-0.0329,0.0287]<br>1.000   |
| <hr/>                 |                                         |
| <b>DN(70%)+RC(SE)</b> |                                         |
| Definitely no         | 0.00267<br>[-0.00198,0.00733]<br>1.000  |
| Probably no           | 0.00359<br>[-0.00265,0.00983]<br>1.000  |
| Probably yes          | 0.0115<br>[-0.00850,0.0316]<br>1.000    |
| Definitely yes        | -0.0178<br>[-0.0486,0.0130]<br>1.000    |
| <hr/>                 |                                         |
| <i>N</i>              | 5784                                    |

95% confidence intervals in brackets

\*  $p < 0.05$ , \*\*  $p < 0.01$ , \*\*\*  $p < 0.001$

**Table S3: Average marginal effects for intention to recommend the COVID-19 vaccine to healthy adults, elderly, and people with any pre-existing health conditions, in each experimental arm relative to control arm.**

|                | <b>Healthy adults</b><br>Marginal effects<br>[95% Confidence<br>Interval]<br>Adjusted p-value | <b>Elderly</b><br>Marginal effects<br>[95% Confidence<br>Interval]<br>Adjusted p-value | <b>Health condition</b><br>Marginal effects<br>[95% Confidence<br>Interval]<br>Adjusted p-value |
|----------------|-----------------------------------------------------------------------------------------------|----------------------------------------------------------------------------------------|-------------------------------------------------------------------------------------------------|
| <b>DN(70%)</b> |                                                                                               |                                                                                        |                                                                                                 |
| Disagree       | 0.0148*<br>[0.00255,0.0271]<br>0.133                                                          | 0.0121<br>[-0.00394,0.0281]<br>0.719                                                   | -0.00964<br>[-0.0298,0.0105]<br>0.179                                                           |
| Not sure       | 0.0237*<br>[0.00411,0.0432]<br>0.133                                                          | 0.0148<br>[-0.00480,0.0344]<br>0.713                                                   | -0.00919<br>[-0.0284,0.0100]<br>0.181                                                           |
| Agree          | -0.0385*<br>[-0.0702,-0.00673]<br>0.133                                                       | -0.0269<br>[-0.0625,0.00873]<br>0.713                                                  | 0.0188<br>[-0.0204,0.0581]<br>0.176                                                             |
| <b>DN</b>      |                                                                                               |                                                                                        |                                                                                                 |
| Disagree       | 0.0111<br>[-0.00108,0.0232]<br>0.167                                                          | -0.000137<br>[-0.0160,0.0157]<br>1.000                                                 | -0.0411***<br>[-0.0616,-0.0205]<br>0.001                                                        |
| Not sure       | 0.0174<br>[-0.00167,0.0365]<br>0.167                                                          | -0.000165<br>[-0.0193,0.0189]<br>1.000                                                 | -0.0391***<br>[-0.0588,-0.0195]<br>0.001                                                        |
| Agree          | -0.0285<br>[-0.0596,0.00271]<br>0.167                                                         | 0.000302<br>[-0.0347,0.0353]<br>1.000                                                  | 0.0802***<br>[0.0405,0.120]<br>0.001                                                            |
| <b>HCW</b>     |                                                                                               |                                                                                        |                                                                                                 |
| Disagree       | 0.00320<br>[-0.00891,0.0153]<br>0.252                                                         | 0.0106<br>[-0.00536,0.0266]<br>0.719                                                   | -0.0150<br>[-0.0352,0.00529]<br>0.127                                                           |
| Not sure       | 0.00485<br>[-0.0135,0.0232]<br>0.252                                                          | 0.0130<br>[-0.00653,0.0326]<br>0.713                                                   | -0.0143<br>[-0.0337,0.00507]<br>0.127                                                           |
| Agree          | -0.00806<br>[-0.0385,0.0224]<br>0.252                                                         | -0.0236<br>[-0.0592,0.0119]<br>0.713                                                   | 0.0293<br>[-0.0103,0.0688]<br>0.125                                                             |
| <b>NF</b>      |                                                                                               |                                                                                        |                                                                                                 |
| Disagree       | 0.0100<br>[-0.00207,0.0221]<br>0.167                                                          | 0.00806<br>[-0.00783,0.0240]<br>0.719                                                  | -0.0187<br>[-0.0387,0.00132]<br>0.095                                                           |
| Not sure       | 0.0157<br>[-0.00323,0.0347]<br>0.167                                                          | 0.00984<br>[-0.00954,0.0292]<br>0.713                                                  | -0.0179<br>[-0.0370,0.00128]<br>0.095                                                           |
| Agree          | -0.0258<br>[-0.0568,0.00527]<br>0.167                                                         | -0.0179<br>[-0.0532,0.0174]<br>0.713                                                   | 0.0366<br>[-0.00246,0.0756]<br>0.093                                                            |
| <b>PF</b>      |                                                                                               |                                                                                        |                                                                                                 |
| Disagree       | 0.0102                                                                                        | 0.00514                                                                                | -0.0288**                                                                                       |



|                    |                                         |                                        |                                          |
|--------------------|-----------------------------------------|----------------------------------------|------------------------------------------|
|                    | [-0.00189,0.0222]<br>0.167              | [-0.0105,0.0208]<br>0.719              | [-0.0489,-0.00859]<br>0.031              |
| Not sure           | 0.0159<br>[-0.00293,0.0348]<br>0.167    | 0.00624<br>[-0.0128,0.0253]<br>0.713   | -0.0275**<br>[-0.0469,-0.00821]<br>0.031 |
| Agree              | -0.0261<br>[-0.0569,0.00479]<br>0.167   | -0.0114<br>[-0.0461,0.0233]<br>0.713   | 0.0563**<br>[0.0171,0.0955]<br>0.031     |
| <b>RC(S)</b>       |                                         |                                        |                                          |
| Disagree           | 0.0163**<br>[0.00393,0.0287]<br>0.133   | 0.0106<br>[-0.00526,0.0265]<br>0.719   | -0.0171<br>[-0.0372,0.00287]<br>0.110    |
| Not sure           | 0.0262**<br>[0.00637,0.0461]<br>0.133   | 0.0130<br>[-0.00641,0.0324]<br>0.713   | -0.0164<br>[-0.0356,0.00278]<br>0.113    |
| Agree              | -0.0425**<br>[-0.0746,-0.0104]<br>0.133 | -0.0236<br>[-0.0588,0.0117]<br>0.713   | 0.0336<br>[-0.00553,0.0726]<br>0.110     |
| <b>RC(SE)</b>      |                                         |                                        |                                          |
| Disagree           | 0.00534<br>[-0.00663,0.0173]<br>0.211   | 0.00154<br>[-0.0142,0.0173]<br>0.979   | -0.0148<br>[-0.0349,0.00533]<br>0.127    |
| Not sure           | 0.00818<br>[-0.0101,0.0265]<br>0.211    | 0.00186<br>[-0.0172,0.0209]<br>0.979   | -0.0141<br>[-0.0334,0.00513]<br>0.127    |
| Agree              | -0.0135<br>[-0.0438,0.0168]<br>0.211    | -0.00339<br>[-0.0382,0.0314]<br>0.979  | 0.0289<br>[-0.0104,0.0682]<br>0.125      |
| <b>DN(70%)+DN</b>  |                                         |                                        |                                          |
| Disagree           | 0.0127*<br>[0.000460,0.0249]<br>0.149   | 0.00193<br>[-0.0135,0.0174]<br>0.979   | -0.0213*<br>[-0.0415,-0.00114]<br>0.081  |
| Not sure           | 0.0201*<br>[0.000739,0.0394]<br>0.153   | 0.00234<br>[-0.0163,0.0210]<br>0.979   | -0.0204*<br>[-0.0398,-0.00107]<br>0.081  |
| Agree              | -0.0328*<br>[-0.0643,-0.00125]<br>0.149 | -0.00427<br>[-0.0383,0.0298]<br>0.979  | 0.0417*<br>[0.00238,0.0811]<br>0.078     |
| <b>DN(70%)+HCW</b> |                                         |                                        |                                          |
| Disagree           | 0.00418<br>[-0.00782,0.0162]<br>0.252   | -0.00548<br>[-0.0209,0.00989]<br>0.719 | -0.0240*<br>[-0.0441,-0.00396]<br>0.068  |
| Not sure           | 0.00637<br>[-0.0119,0.0246]<br>0.252    | -0.00653<br>[-0.0248,0.0118]<br>0.713  | -0.0230*<br>[-0.0423,-0.00372]<br>0.068  |
| Agree              | -0.0105<br>[-0.0408,0.0197]<br>0.252    | 0.0120<br>[-0.0217,0.0457]<br>0.713    | 0.0470*<br>[0.00790,0.0862]<br>0.065     |
| <b>DN(70%)+NF</b>  |                                         |                                        |                                          |
| Disagree           | 0.00936                                 | 0.0141                                 | -0.0123                                  |

|                       |                                          |                                         |                                         |
|-----------------------|------------------------------------------|-----------------------------------------|-----------------------------------------|
|                       | [-0.00304,0.0218]<br>0.181               | [-0.00210,0.0302]<br>0.719              | [-0.0326,0.00789]<br>0.145              |
| Not sure              | 0.0146<br>[-0.00477,0.0340]<br>0.185     | 0.0173<br>[-0.00254,0.0371]<br>0.713    | -0.0118<br>[-0.0311,0.00755]<br>0.145   |
| Agree                 | -0.0240<br>[-0.0558,0.00778]<br>0.181    | -0.0313<br>[-0.0673,0.00462]<br>0.713   | 0.0241<br>[-0.0154,0.0637]<br>0.145     |
| <b>DN(70%)+PF</b>     |                                          |                                         |                                         |
| Disagree              | 0.0101<br>[-0.00188,0.0221]<br>0.167     | 0.0159<br>[-0.0000648,0.0319]<br>0.719  | -0.0198<br>[-0.0398,0.000177]<br>0.085  |
| Not sure              | 0.0159<br>[-0.00292,0.0347]<br>0.167     | 0.0196<br>[-0.0000347,0.0392]<br>0.713  | -0.0190<br>[-0.0381,0.000176]<br>0.085  |
| Agree                 | -0.0260<br>[-0.0568,0.00477]<br>0.167    | -0.0355<br>[-0.0711,0.0000810]<br>0.713 | 0.0387<br>[-0.000198,0.0777]<br>0.083   |
| <b>DN(70%)+RC(S)</b>  |                                          |                                         |                                         |
| Disagree              | 0.0124*<br>[0.000140,0.0247]<br>0.149    | 0.00325<br>[-0.0129,0.0194]<br>0.943    | -0.0235*<br>[-0.0436,-0.00327]<br>0.068 |
| Not sure              | 0.0196*<br>[0.000215,0.0390]<br>0.153    | 0.00393<br>[-0.0156,0.0235]<br>0.943    | -0.0225*<br>[-0.0418,-0.00310]<br>0.068 |
| Agree                 | -0.0320*<br>[-0.0636,-0.000404]<br>0.149 | -0.00718<br>[-0.0428,0.0285]<br>0.943   | 0.0459*<br>[0.00658,0.0853]<br>0.065    |
| <b>DN(70%)+RC(SE)</b> |                                          |                                         |                                         |
| Disagree              | 0.00744<br>[-0.00497,0.0199]<br>0.204    | 0.0136<br>[-0.00261,0.0299]<br>0.719    | -0.00524<br>[-0.0254,0.0149]<br>0.243   |
| Not sure              | 0.0115<br>[-0.00770,0.0307]<br>0.204     | 0.0167<br>[-0.00317,0.0366]<br>0.713    | -0.00499<br>[-0.0242,0.0142]<br>0.243   |
| Agree                 | -0.0190<br>[-0.0506,0.0127]<br>0.204     | -0.0304<br>[-0.0665,0.00577]<br>0.713   | 0.0102<br>[-0.0291,0.0496]<br>0.241     |
| <i>N</i>              | 5784                                     | 5784                                    | 5784                                    |

95% confidence intervals in brackets

\*  $p < 0.05$ , \*\*  $p < 0.01$ , \*\*\*  $p < 0.001$

**Table S4: Chi-square analysis describing associations between all experimental arms and proportion of hesitant participants who cited reasons of vaccine safety or side effect concerns after message exposure.**

| Hesitancy to:                                            | Intention to vaccinate |         | Recommend healthy adults |         | Recommend elderly |         | Recommend people with health conditions |         |
|----------------------------------------------------------|------------------------|---------|--------------------------|---------|-------------------|---------|-----------------------------------------|---------|
|                                                          | No (%)                 | Yes (%) | No (%)                   | Yes (%) | No (%)            | Yes (%) | No (%)                                  | Yes (%) |
| Worried about the safety or side effects of the vaccine. |                        |         |                          |         |                   |         |                                         |         |
| DN(70%)                                                  | 22.78                  | 77.22   | 30.00                    | 70.00   | 20.00             | 80.00   | 18.95                                   | 81.05   |
| DN                                                       | 27.74                  | 72.26   | 28.81                    | 71.19   | 20.43             | 79.57   | 20.92                                   | 79.08   |
| HCW                                                      | 22.86                  | 77.14   | 33.33                    | 66.67   | 14.85             | 85.15   | 14.55                                   | 85.45   |
| NF                                                       | 32.67                  | 67.33   | 34.48                    | 65.52   | 22.86             | 77.14   | 25.53                                   | 74.47   |
| PF                                                       | 21.92                  | 78.08   | 31.15                    | 68.85   | 14.15             | 85.85   | 20.24                                   | 79.76   |
| RC(S)                                                    | 26.67                  | 73.33   | 29.51                    | 70.49   | 18.18             | 81.82   | 19.78                                   | 80.22   |
| RC(SE)                                                   | 20.53                  | 79.47   | 19.3                     | 80.7    | 25.24             | 74.76   | 19.34                                   | 80.66   |
| Control                                                  | 18.71                  | 81.29   | 38.46                    | 61.54   | 23.08             | 76.92   | 20.32                                   | 79.68   |
| DN(70%) + DN                                             | 27.04                  | 72.96   | 26.56                    | 73.44   | 17.12             | 82.88   | 23.56                                   | 76.44   |
| DN(70%) + HCW                                            | 22.73                  | 77.27   | 27.27                    | 72.73   | 15.6              | 84.4    | 19.66                                   | 80.34   |
| DN(70%) + NF                                             | 29.33                  | 70.67   | 28.07                    | 71.93   | 20.41             | 79.59   | 23.3                                    | 76.7    |
| DN(70%) + PF                                             | 30.67                  | 69.33   | 40.00                    | 60.00   | 28.57             | 71.43   | 21.76                                   | 78.24   |
| DN(70%) + RC(S)                                          | 24.32                  | 75.68   | 30.77                    | 69.23   | 18.89             | 81.11   | 21.69                                   | 78.31   |
| DN(70%) + RC(SE)                                         | 27.86                  | 72.14   | 24.44                    | 75.56   | 18.45             | 81.55   | 19.35                                   | 80.65   |
| Pearson chi-square:                                      | 16.7902                |         | 9.7281                   |         | 14.3616           |         | 9.3312                                  |         |
| P-Value:                                                 | 0.209                  |         | 0.716                    |         | 0.349             |         | 0.747                                   |         |

**Table S5: Average marginal treatment effects based on interaction with age category with respect to selecting the intent option for definitely accepting the COVID-19 vaccine, and agreeing to recommend the vaccine to healthy adults, elderly, and people with pre-existing health conditions; in each experimental arm relative to control arm.**

|                | <b>Intention to vaccinate</b>                 | <b>Healthy adults</b>                         | <b>Elderly</b>                                | <b>Health condition</b>                       |
|----------------|-----------------------------------------------|-----------------------------------------------|-----------------------------------------------|-----------------------------------------------|
|                | Marginal effects<br>[95% Confidence Interval] |
|                | Adjusted p-value                              | Adjusted p-value                              | Adjusted p-value                              | Adjusted p-value                              |
| <b>DN(70%)</b> |                                               |                                               |                                               |                                               |
| Age ≤ 30       | -0.0210<br>[-0.0685,0.0265]<br>1.000          | -0.0357<br>[-0.0840,0.0127]<br>1.000          | 0.0127<br>[-0.0424,0.0677]<br>1.000           | 0.00830<br>[-0.0570,0.0736]<br>1.000          |
| Age > 30       | -0.0289<br>[-0.0680,0.0103]<br>0.429          | -0.0387<br>[-0.0803,0.00287]<br>0.317         | -0.0512*<br>[-0.0974,-0.00510]<br>0.317       | 0.0242<br>[-0.0249,0.0732]<br>0.296           |
| <b>DN</b>      |                                               |                                               |                                               |                                               |
| Age ≤ 30       | 0.0207<br>[-0.0273,0.0687]<br>1.000           | -0.0280<br>[-0.0750,0.0189]<br>1.000          | 0.0131<br>[-0.0420,0.0681]<br>1.000           | 0.0656*<br>[0.00108,0.130]<br>0.977           |
| Age > 30       | -0.00321<br>[-0.0435,0.0371]<br>0.549         | -0.0278<br>[-0.0687,0.0132]<br>0.356          | -0.00806<br>[-0.0532,0.0370]<br>0.843         | 0.0873***<br>[0.0370,0.138]<br>0.014          |
| <b>HCW</b>     |                                               |                                               |                                               |                                               |
| Age ≤ 30       | 0.0121<br>[-0.0352,0.0593]<br>1.000           | -0.0128<br>[-0.0576,0.0321]<br>1.000          | -0.00853<br>[-0.0631,0.0461]<br>1.000         | 0.0249<br>[-0.0408,0.0906]<br>1.000           |
| Age > 30       | -0.0147<br>[-0.0553,0.0259]<br>0.549          | -0.00527<br>[-0.0462,0.0356]<br>0.61          | -0.0349<br>[-0.0814,0.0116]<br>0.455          | 0.0308<br>[-0.0187,0.0803]<br>0.249           |
| <b>NF</b>      |                                               |                                               |                                               |                                               |
| Age ≤ 30       | -0.00890<br>[-0.0559,0.0381]<br>1.000         | -0.0302<br>[-0.0778,0.0174]<br>1.000          | 0.000910<br>[-0.0557,0.0575]<br>1.000         | 0.0518<br>[-0.0124,0.116]<br>0.977            |
| Age > 30       | -0.0493*<br>[-0.0892,-0.00942]<br>0.141       | -0.0218<br>[-0.0623,0.0186]<br>0.409          | -0.0286<br>[-0.0735,0.0162]<br>0.586          | 0.0263<br>[-0.0228,0.0753]<br>0.296           |
| <b>PF</b>      |                                               |                                               |                                               |                                               |
| Age ≤ 30       | 0.0224<br>[-0.0256,0.0703]<br>1.000           | -0.0513*<br>[-0.102,-0.000985]<br>1.000       | 0.00780<br>[-0.0468,0.0624]<br>1.000          | 0.0574<br>[-0.00624,0.121]<br>0.977           |
| Age > 30       | -0.00322<br>[-0.0428,0.0363]<br>0.549         | -0.0104<br>[-0.0495,0.0286]<br>0.610          | -0.0234<br>[-0.0682,0.0213]<br>0.586          | 0.0529*<br>[0.00324,0.103]<br>0.102           |
| <b>RC(S)</b>   |                                               |                                               |                                               |                                               |
| Age ≤ 30       | 0.0192<br>[-0.0277,0.0661]<br>1.000           | -0.0329<br>[-0.0800,0.0143]<br>1.000          | 0.00768<br>[-0.0447,0.0600]<br>1.000          | 0.0432<br>[-0.0192,0.106]<br>0.977            |
| Age > 30       | -0.0186<br>[-0.0585,0.0212]<br>0.549          | -0.0487*<br>[-0.0917,-0.00572]<br>0.317       | -0.0504*<br>[-0.0977,-0.00300]<br>0.317       | 0.0219<br>[-0.0282,0.0720]<br>0.296           |
| <b>RC(SE)</b>  |                                               |                                               |                                               |                                               |

|                       |                                         |                                       |                                        |                                      |
|-----------------------|-----------------------------------------|---------------------------------------|----------------------------------------|--------------------------------------|
| Age ≤ 30              | 0.0184<br>[-0.0299,0.0668]<br>1.000     | -0.0222<br>[-0.0685,0.0240]<br>1.000  | -0.000669<br>[-0.0546,0.0533]<br>1.000 | 0.00916<br>[-0.0544,0.0728]<br>1.000 |
| Age > 30              | -0.0277<br>[-0.0674,0.0119]<br>0.429    | -0.00708<br>[-0.0467,0.0325]<br>0.61  | -0.00515<br>[-0.0505,0.0402]<br>0.843  | 0.0391<br>[-0.0109,0.0891]<br>0.192  |
| <b>DN(70%)+DN</b>     |                                         |                                       |                                        |                                      |
| Age ≤ 30              | 0.00925<br>[-0.0376,0.0561]<br>1.000    | -0.0237<br>[-0.0697,0.0222]<br>1.000  | 0.00825<br>[-0.0450,0.0615]<br>1.000   | 0.0340<br>[-0.0293,0.0974]<br>0.977  |
| Age > 30              | -0.0249<br>[-0.0643,0.0145]<br>0.429    | -0.0386<br>[-0.0809,0.00374]<br>0.317 | -0.0125<br>[-0.0565,0.0315]<br>0.843   | 0.0432<br>[-0.00711,0.0935]<br>0.161 |
| <b>DN(70%)+HCW</b>    |                                         |                                       |                                        |                                      |
| Age ≤ 30              | 0.0138<br>[-0.0333,0.0610]<br>1.000     | -0.0163<br>[-0.0612,0.0285]<br>1.000  | 0.0221<br>[-0.0300,0.0741]<br>1.000    | 0.0166<br>[-0.0460,0.0792]<br>1.000  |
| Age > 30              | -0.0281<br>[-0.0680,0.0117]<br>0.429    | -0.00652<br>[-0.0469,0.0339]<br>0.61  | 0.00483<br>[-0.0392,0.0488]<br>0.843   | 0.0651*<br>[0.0149,0.115]<br>0.043   |
| <b>DN(70%)+NF</b>     |                                         |                                       |                                        |                                      |
| Age ≤ 30              | -0.0175<br>[-0.0647,0.0298]<br>1.000    | -0.00655<br>[-0.0526,0.0395]<br>1.000 | -0.0202<br>[-0.0768,0.0364]<br>1.000   | 0.0214<br>[-0.0422,0.0850]<br>1.000  |
| Age > 30              | -0.0481*<br>[-0.0883,-0.00788]<br>0.141 | -0.0340<br>[-0.0767,0.00858]<br>0.317 | -0.0388<br>[-0.0850,0.00755]<br>0.455  | 0.0220<br>[-0.0284,0.0724]<br>0.296  |
| <b>DN(70%)+PF</b>     |                                         |                                       |                                        |                                      |
| Age ≤ 30              | -0.00288<br>[-0.0507,0.0450]<br>1.000   | -0.0227<br>[-0.0698,0.0244]<br>1.000  | -0.0520<br>[-0.109,0.00516]<br>1.000   | -0.0198<br>[-0.0840,0.0444]<br>1.000 |
| Age > 30              | -0.0246<br>[-0.0637,0.0145]<br>0.429    | -0.0261<br>[-0.0663,0.0142]<br>0.356  | -0.0244<br>[-0.0695,0.0208]<br>0.586   | 0.0740**<br>[0.0252,0.123]<br>0.019  |
| <b>DN(70%)+RC(S)</b>  |                                         |                                       |                                        |                                      |
| Age ≤ 30              | 0.0183<br>[-0.0304,0.0671]<br>1.000     | -0.0155<br>[-0.0626,0.0315]<br>1.000  | 0.0147<br>[-0.0412,0.0705]<br>1.000    | 0.0393<br>[-0.0238,0.103]<br>0.977   |
| Age > 30              | -0.0152<br>[-0.0549,0.0245]<br>0.549    | -0.0395<br>[-0.0813,0.00236]<br>0.317 | -0.0216<br>[-0.0678,0.0246]<br>0.586   | 0.0463<br>[-0.00412,0.0966]<br>0.149 |
| <b>DN(70%)+RC(SE)</b> |                                         |                                       |                                        |                                      |
| Age ≤ 30              | 0.00311<br>[-0.0448,0.0510]<br>1.000    | -0.0113<br>[-0.0580,0.0353]<br>1.000  | -0.0203<br>[-0.0764,0.0358]<br>1.000   | 0.0187<br>[-0.0452,0.0826]<br>1.000  |
| Age > 30              | -0.0322<br>[-0.0723,0.00791]<br>0.429   | -0.0235<br>[-0.0657,0.0187]<br>0.409  | -0.0375<br>[-0.0845,0.00940]<br>0.455  | 0.00169<br>[-0.0482,0.0516]<br>0.573 |
| <i>N</i>              | 5784                                    | 5784                                  | 5784                                   | 5784                                 |

95% confidence intervals in brackets

\*  $p < 0.05$ , \*\*  $p < 0.01$ , \*\*\*  $p < 0.001$

**Table S6: Average marginal treatment effects based on interaction with sex with respect to selecting the intent option for definitely accepting the COVID-19 vaccine, and agreeing to recommend the vaccine to healthy adults, elderly, and people with pre-existing health conditions; in each experimental arm relative to control arm.**

|                | <b>Intention to vaccinate</b>                 | <b>Healthy adults</b>                         | <b>Elderly</b>                                | <b>Health condition</b>                       |
|----------------|-----------------------------------------------|-----------------------------------------------|-----------------------------------------------|-----------------------------------------------|
|                | Marginal effects<br>[95% Confidence Interval] |
|                | Adjusted p-value                              | Adjusted p-value                              | Adjusted p-value                              | Adjusted p-value                              |
| <b>DN(70%)</b> |                                               |                                               |                                               |                                               |
| Male           | -0.0306<br>[-0.0743,0.0132]<br>0.418          | -0.0352<br>[-0.0800,0.00960]<br>0.779         | -0.0149<br>[-0.0663,0.0364]<br>1.000          | 0.0333<br>[-0.0228,0.0894]<br>0.264           |
| Female         | -0.0208<br>[-0.0626,0.0211]<br>1.000          | -0.0419<br>[-0.0869,0.00317]<br>0.482         | -0.0371<br>[-0.0866,0.0124]<br>0.739          | 0.00432<br>[-0.0507,0.0593]<br>1.000          |
| <b>DN</b>      |                                               |                                               |                                               |                                               |
| Male           | 0.00891<br>[-0.0358,0.0536]<br>0.569          | -0.0228<br>[-0.0658,0.0202]<br>0.779          | 0.00913<br>[-0.0423,0.0605]<br>1.000          | 0.0677*<br>[0.0120,0.123]<br>0.080            |
| Female         | 0.00378<br>[-0.0390,0.0466]<br>1.000          | -0.0347<br>[-0.0799,0.0106]<br>0.482          | -0.00717<br>[-0.0547,0.0403]<br>0.810         | 0.0942**<br>[0.0379,0.151]<br>0.014           |
| <b>HCW</b>     |                                               |                                               |                                               |                                               |
| Male           | -0.0313<br>[-0.0747,0.0122]<br>0.418          | -0.0203<br>[-0.0649,0.0242]<br>0.779          | -0.00954<br>[-0.0605,0.0415]<br>1.000         | 0.0320<br>[-0.0231,0.0872]<br>0.264           |
| Female         | 0.0271<br>[-0.0176,0.0719]<br>1.000           | 0.00283<br>[-0.0391,0.0447]<br>0.559          | -0.0362<br>[-0.0857,0.0133]<br>0.739          | 0.0273<br>[-0.0295,0.0841]<br>0.763           |
| <b>NF</b>      |                                               |                                               |                                               |                                               |
| Male           | -0.0461*<br>[-0.0900,-0.00210]<br>0.316       | -0.0397<br>[-0.0844,0.00497]<br>0.779         | -0.00518<br>[-0.0564,0.0461]<br>1.000         | 0.0449<br>[-0.0109,0.101]<br>0.209            |
| Female         | -0.0205<br>[-0.0626,0.0216]<br>1.000          | -0.0114<br>[-0.0545,0.0316]<br>0.491          | -0.0290<br>[-0.0774,0.0195]<br>0.739          | 0.0277<br>[-0.0268,0.0823]<br>0.763           |
| <b>PF</b>      |                                               |                                               |                                               |                                               |
| Male           | -0.00465<br>[-0.0489,0.0396]<br>0.569         | -0.0202<br>[-0.0646,0.0242]<br>0.779          | 0.0124<br>[-0.0386,0.0634]<br>1.000           | 0.0736**<br>[0.0179,0.129]<br>0.08            |
| Female         | 0.0177<br>[-0.0244,0.0598]<br>1.000           | -0.0312<br>[-0.0743,0.0119]<br>0.482          | -0.0320<br>[-0.0793,0.0153]<br>0.739          | 0.0391<br>[-0.0160,0.0942]<br>0.695           |
| <b>RC(S)</b>   |                                               |                                               |                                               |                                               |
| Male           | -0.0254<br>[-0.0688,0.0181]<br>0.418          | -0.0382<br>[-0.0822,0.00578]<br>0.779         | -0.0137<br>[-0.0651,0.0376]<br>1.000          | 0.0401<br>[-0.0152,0.0955]<br>0.249           |
| Female         | 0.0190<br>[-0.0235,0.0614]<br>1.000           | -0.0476*<br>[-0.0947,-0.000469]<br>0.482      | -0.0318<br>[-0.0801,0.0164]<br>0.739          | 0.0266<br>[-0.0285,0.0817]<br>0.763           |
| <b>RC(SE)</b>  |                                               |                                               |                                               |                                               |

|                       |                                        |                                       |                                       |                                      |
|-----------------------|----------------------------------------|---------------------------------------|---------------------------------------|--------------------------------------|
| Male                  | -0.00755<br>[-0.0521,0.0370]<br>0.569  | -0.00113<br>[-0.0428,0.0406]<br>0.779 | 0.0411<br>[-0.00898,0.0912]<br>1.000  | 0.0580*<br>[0.00182,0.114]<br>0.121  |
| Female                | -0.0114<br>[-0.0535,0.0307]<br>1.000   | -0.0260<br>[-0.0700,0.0181]<br>0.482  | -0.0429<br>[-0.0914,0.00563]<br>0.739 | 0.00147<br>[-0.0536,0.0565]<br>1.000 |
| <b>DN(70%)+DN</b>     |                                        |                                       |                                       |                                      |
| Male                  | -0.0286<br>[-0.0717,0.0144]<br>0.418   | -0.0287<br>[-0.0719,0.0146]<br>0.779  | -0.00707<br>[-0.0576,0.0435]<br>1.000 | 0.0323<br>[-0.0231,0.0876]<br>0.264  |
| Female                | 0.00629<br>[-0.0359,0.0485]<br>1.000   | -0.0375<br>[-0.0836,0.00851]<br>0.482 | -0.00104<br>[-0.0466,0.0446]<br>0.811 | 0.0521<br>[-0.00375,0.108]<br>0.333  |
| <b>DN(70%)+HCW</b>    |                                        |                                       |                                       |                                      |
| Male                  | -0.0337<br>[-0.0771,0.00977]<br>0.418  | -0.0243<br>[-0.0673,0.0187]<br>0.779  | 0.0155<br>[-0.0340,0.0651]<br>1.000   | 0.0233<br>[-0.0324,0.0790]<br>0.332  |
| Female                | 0.0118<br>[-0.0309,0.0545]<br>1.000    | 0.00619<br>[-0.0364,0.0488]<br>0.559  | 0.00999<br>[-0.0357,0.0557]<br>0.740  | 0.0698*<br>[0.0149,0.125]<br>0.085   |
| <b>DN(70%)+NF</b>     |                                        |                                       |                                       |                                      |
| Male                  | -0.0583**<br>[-0.102,-0.0150]<br>0.117 | -0.0305<br>[-0.0741,0.0131]<br>0.779  | -0.0407<br>[-0.0931,0.0117]<br>1.000  | 0.0326<br>[-0.0230,0.0882]<br>0.264  |
| Female                | -0.00992<br>[-0.0542,0.0344]<br>1.000  | -0.0138<br>[-0.0612,0.0336]<br>0.491  | -0.0172<br>[-0.0669,0.0325]<br>0.739  | 0.0155<br>[-0.0406,0.0716]<br>1.000  |
| <b>DN(70%)+PF</b>     |                                        |                                       |                                       |                                      |
| Male                  | -0.0272<br>[-0.0710,0.0165]<br>0.418   | -0.0252<br>[-0.0686,0.0183]<br>0.779  | -0.0229<br>[-0.0743,0.0285]<br>1.000  | 0.0452<br>[-0.00948,0.1000]<br>0.209 |
| Female                | -0.00577<br>[-0.0475,0.0360]<br>1.000  | -0.0271<br>[-0.0707,0.0165]<br>0.482  | -0.0465<br>[-0.0957,0.00279]<br>0.739 | 0.0322<br>[-0.0231,0.0875]<br>0.763  |
| <b>DN(70%)+RC(S)</b>  |                                        |                                       |                                       |                                      |
| Male                  | -0.0134<br>[-0.0572,0.0304]<br>0.555   | -0.0229<br>[-0.0664,0.0207]<br>0.779  | 0.00517<br>[-0.0458,0.0561]<br>1.000  | 0.0673*<br>[0.0125,0.122]<br>0.08    |
| Female                | 0.00870<br>[-0.0346,0.0520]<br>1.000   | -0.0418<br>[-0.0877,0.00418]<br>0.482 | -0.0178<br>[-0.0678,0.0322]<br>0.739  | 0.0234<br>[-0.0329,0.0797]<br>0.856  |
| <b>DN(70%)+RC(SE)</b> |                                        |                                       |                                       |                                      |
| Male                  | -0.0412<br>[-0.0855,0.00299]<br>0.352  | -0.00707<br>[-0.0501,0.0359]<br>0.779 | -0.0366<br>[-0.0895,0.0162]<br>1.000  | 0.0129<br>[-0.0425,0.0683]<br>0.427  |
| Female                | 0.00501<br>[-0.0381,0.0481]<br>1.000   | -0.0320<br>[-0.0785,0.0145]<br>0.482  | -0.0217<br>[-0.0709,0.0275]<br>0.739  | 0.00761<br>[-0.0482,0.0634]<br>1.000 |
| <i>N</i>              | 5784                                   | 5784                                  | 5784                                  | 5784                                 |

95% confidence intervals in brackets

\*  $p < 0.05$ , \*\*  $p < 0.01$ , \*\*\*  $p < 0.001$

**Table S7: Average marginal treatment effects based on interaction with education level with respect to selecting the intent option for definitely accepting the COVID-19 vaccine, and agreeing to recommend the vaccine to healthy adults, elderly, and people with pre-existing health conditions; in each experimental arm relative to control arm.**

|                | <b>Intention to vaccinate</b>                 | <b>Healthy adults</b>                         | <b>Elderly</b>                                | <b>Health condition</b>                       |
|----------------|-----------------------------------------------|-----------------------------------------------|-----------------------------------------------|-----------------------------------------------|
|                | Marginal effects<br>[95% Confidence Interval] |
|                | Adjusted p-value                              | Adjusted p-value                              | Adjusted p-value                              | Adjusted p-value                              |
| <b>DN(70%)</b> |                                               |                                               |                                               |                                               |
| Below tertiary | -0.0209<br>[-0.0633,0.0214]<br>1.000          | -0.00277<br>[-0.0465,0.0410]<br>1.000         | -0.0429<br>[-0.0917,0.00600]<br>0.283         | 0.000846<br>[-0.0547,0.0564]<br>1.000         |
| Above tertiary | -0.0305<br>[-0.0739,0.0129]<br>1.000          | -0.0792***<br>[-0.126,-0.0322]<br>0.014       | -0.00658<br>[-0.0590,0.0458]<br>1.000         | 0.0287<br>[-0.0270,0.0844]<br>0.103           |
| <b>DN</b>      |                                               |                                               |                                               |                                               |
| Below tertiary | 0.00112<br>[-0.0430,0.0453]<br>1.000          | -0.0113<br>[-0.0572,0.0346]<br>1.000          | 0.00700<br>[-0.0417,0.0557]<br>0.831          | 0.0726*<br>[0.0165,0.129]<br>0.167            |
| Above tertiary | 0.0123<br>[-0.0311,0.0558]<br>1.000           | -0.0455*<br>[-0.0875,-0.00349]<br>0.066       | -0.00643<br>[-0.0565,0.0436]<br>1.000         | 0.116***<br>[0.0574,0.174]<br>0.001           |
| <b>HCW</b>     |                                               |                                               |                                               |                                               |
| Below tertiary | -0.0143<br>[-0.0569,0.0284]<br>1.000          | 0.0163<br>[-0.0269,0.0595]<br>1.000           | -0.0415<br>[-0.0911,0.00803]<br>0.283         | 0.00298<br>[-0.0539,0.0599]<br>1.000          |
| Above tertiary | 0.0125<br>[-0.0337,0.0587]<br>1.000           | -0.0336<br>[-0.0770,0.00974]<br>0.097         | -0.00318<br>[-0.0543,0.0479]<br>1.000         | 0.0502<br>[-0.00489,0.105]<br>0.052           |
| <b>NF</b>      |                                               |                                               |                                               |                                               |
| Below tertiary | -0.0315<br>[-0.0743,0.0114]<br>1.000          | 0.00302<br>[-0.0406,0.0466]<br>1.000          | -0.0186<br>[-0.0673,0.0300]<br>0.675          | 0.00534<br>[-0.0503,0.0610]<br>1.000          |
| Above tertiary | -0.0342<br>[-0.0776,0.00920]<br>1.000         | -0.0567*<br>[-0.101,-0.0121]<br>0.038         | -0.0179<br>[-0.0690,0.0333]<br>1.000          | 0.0618*<br>[0.00695,0.117]<br>0.031           |
| <b>PF</b>      |                                               |                                               |                                               |                                               |
| Below tertiary | 0.00972<br>[-0.0321,0.0515]<br>1.000          | -0.0128<br>[-0.0566,0.0311]<br>1.000          | -0.0214<br>[-0.0683,0.0255]<br>0.590          | 0.0183<br>[-0.0357,0.0724]<br>1.000           |
| Above tertiary | 0.00348<br>[-0.0420,0.0490]<br>1.000          | -0.0358<br>[-0.0796,0.00802]<br>0.097         | 0.00157<br>[-0.0507,0.0538]<br>1.000          | 0.0895**<br>[0.0314,0.148]<br>0.012           |
| <b>RC(S)</b>   |                                               |                                               |                                               |                                               |
| Below tertiary | 0.00604<br>[-0.0363,0.0484]<br>1.000          | -0.0377<br>[-0.0849,0.00951]<br>1.000         | -0.0459<br>[-0.0950,0.00314]<br>0.283         | -0.0181<br>[-0.0737,0.0375]<br>1.000          |
| Above tertiary | -0.0138<br>[-0.0576,0.0301]<br>1.000          | -0.0446*<br>[-0.0881,-0.00114]<br>0.071       | 0.00356<br>[-0.0473,0.0544]<br>1.000          | 0.0815**<br>[0.0263,0.137]<br>0.012           |
| <b>RC(SE)</b>  |                                               |                                               |                                               |                                               |



|                       |                                        |                                        |                                        |                                       |
|-----------------------|----------------------------------------|----------------------------------------|----------------------------------------|---------------------------------------|
| Below tertiary        | -0.00230<br>[-0.0453,0.0407]<br>1.000  | 0.00582<br>[-0.0381,0.0498]<br>1.000   | -0.0144<br>[-0.0634,0.0345]<br>0.696   | -0.00624<br>[-0.0626,0.0501]<br>1.000 |
| Above tertiary        | -0.0177<br>[-0.0612,0.0258]<br>1.000   | -0.0326<br>[-0.0742,0.00897]<br>0.097  | 0.00795<br>[-0.0415,0.0574]<br>1.000   | 0.0585*<br>[0.00354,0.113]<br>0.035   |
| <b>DN(70%)+DN</b>     |                                        |                                        |                                        |                                       |
| Below tertiary        | -0.0179<br>[-0.0596,0.0238]<br>1.000   | -0.0219<br>[-0.0667,0.0228]<br>1.000   | -0.0159<br>[-0.0629,0.0312]<br>0.687   | -0.0126<br>[-0.0686,0.0434]<br>1.000  |
| Above tertiary        | -0.000547<br>[-0.0451,0.0440]<br>1.000 | -0.0382<br>[-0.0832,0.00671]<br>0.097  | 0.00924<br>[-0.0403,0.0588]<br>1.000   | 0.0929**<br>[0.0373,0.148]<br>0.007   |
| <b>DN(70%)+HCW</b>    |                                        |                                        |                                        |                                       |
| Below tertiary        | -0.00594<br>[-0.0502,0.0383]<br>1.000  | 0.0155<br>[-0.0273,0.0583]<br>1.000    | 0.0235<br>[-0.0240,0.0711]<br>0.590    | 0.0310<br>[-0.0257,0.0877]<br>1.000   |
| Above tertiary        | -0.0151<br>[-0.0569,0.0268]<br>1.000   | -0.0380<br>[-0.0810,0.00503]<br>0.097  | 0.00278<br>[-0.0447,0.0503]<br>1.000   | 0.0597*<br>[0.00578,0.114]<br>0.031   |
| <b>DN(70%)+NF</b>     |                                        |                                        |                                        |                                       |
| Below tertiary        | -0.0414<br>[-0.0847,0.00202]<br>1.000  | -0.0117<br>[-0.0582,0.0349]<br>1.000   | -0.0723**<br>[-0.124,-0.0209]<br>0.085 | -0.0245<br>[-0.0805,0.0314]<br>1.000  |
| Above tertiary        | -0.0287<br>[-0.0722,0.0149]<br>1.000   | -0.0353<br>[-0.0786,0.00793]<br>0.097  | 0.0162<br>[-0.0346,0.0670]<br>1.000    | 0.0694*<br>[0.0129,0.126]<br>0.022    |
| <b>DN(70%)+PF</b>     |                                        |                                        |                                        |                                       |
| Below tertiary        | -0.00792<br>[-0.0512,0.0354]<br>1.000  | 0.00264<br>[-0.0412,0.0465]<br>1.000   | -0.0333<br>[-0.0840,0.0173]<br>0.354   | 0.0307<br>[-0.0254,0.0868]<br>1.000   |
| Above tertiary        | -0.0243<br>[-0.0666,0.0180]<br>1.000   | -0.0555*<br>[-0.0987,-0.0122]<br>0.038 | -0.0372<br>[-0.0874,0.0130]<br>1.000   | 0.0428<br>[-0.0115,0.0970]<br>0.054   |
| <b>DN(70%)+RC(S)</b>  |                                        |                                        |                                        |                                       |
| Below tertiary        | 0.00694<br>[-0.0370,0.0509]<br>1.000   | -0.000504<br>[-0.0447,0.0437]<br>1.000 | -0.00328<br>[-0.0531,0.0465]<br>0.935  | 0.00893<br>[-0.0479,0.0657]<br>1.000  |
| Above tertiary        | -0.0113<br>[-0.0543,0.0317]<br>1.000   | -0.0660**<br>[-0.111,-0.0205]<br>0.025 | -0.0113<br>[-0.0623,0.0397]<br>1.000   | 0.0776**<br>[0.0230,0.132]<br>0.012   |
| <b>DN(70%)+RC(SE)</b> |                                        |                                        |                                        |                                       |
| Below tertiary        | -0.0162<br>[-0.0596,0.0271]<br>1.000   | -0.00923<br>[-0.0548,0.0364]<br>1.000  | -0.0552*<br>[-0.106,-0.00451]<br>0.247 | -0.0343<br>[-0.0904,0.0217]<br>1.000  |
| Above tertiary        | -0.0193<br>[-0.0633,0.0247]<br>1.000   | -0.0253<br>[-0.0691,0.0185]<br>0.162   | -0.00203<br>[-0.0534,0.0494]<br>1.000  | 0.0497<br>[-0.00570,0.105]<br>0.052   |
| <i>N</i>              | 5784                                   | 5784                                   | 5784                                   | 5784                                  |

95% confidence intervals in brackets

\*  $p < 0.05$ , \*\*  $p < 0.01$ , \*\*\*  $p < 0.001$

## Supplementary Figures

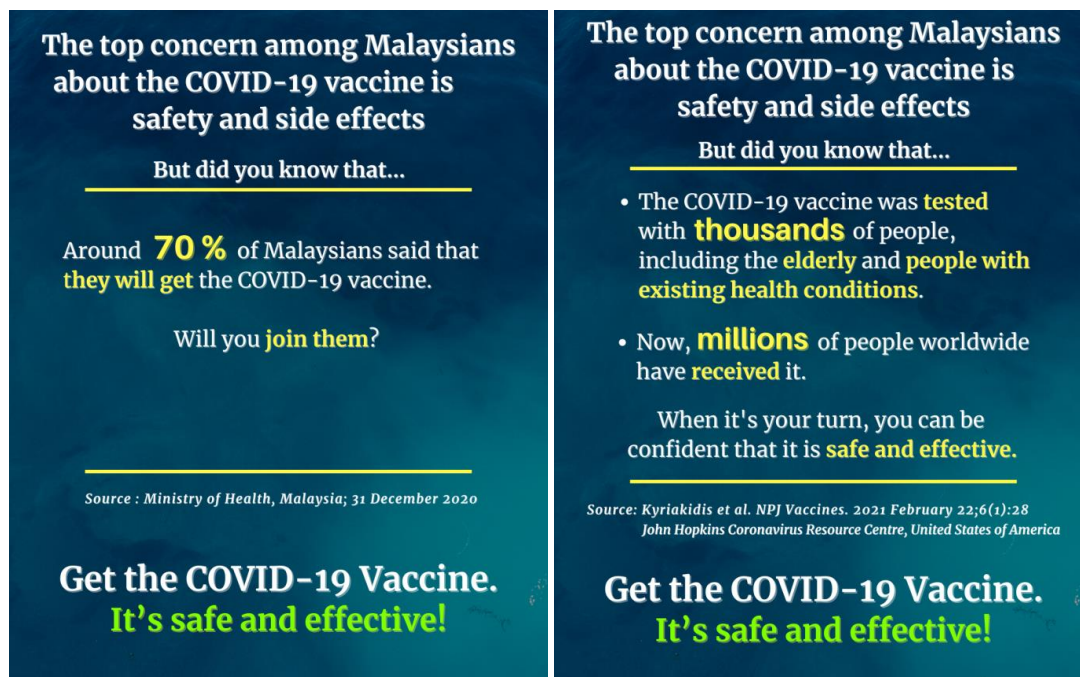

Figure S1: Examples of actual messages used in the survey experiment.

### Reasons cited by respondents who remained hesitant to vaccinate according to proportion, % (n = 2,085)

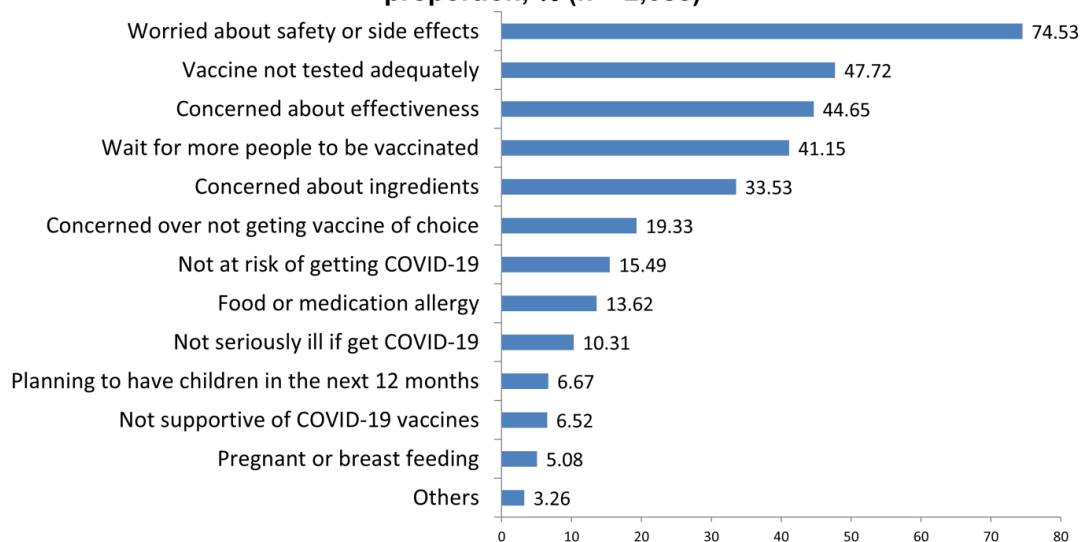

**Figure S2: Tabulation of reasons for remaining hesitant to vaccinate according to proportion of participants who remained hesitant after message exposure.**

### Reasons cited by respondents who remained hesitant to recommend healthy adults according to proportion, % (n = 801)

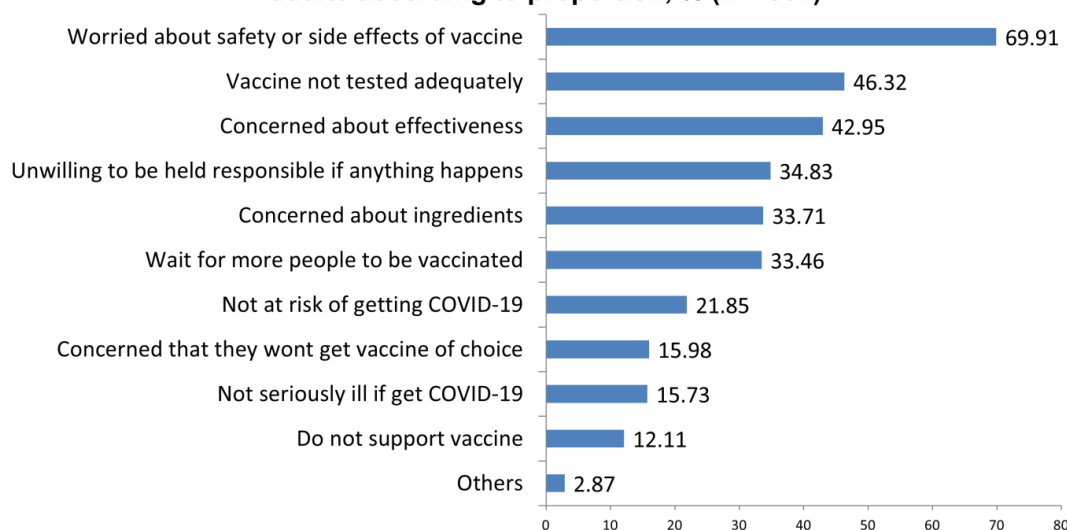

**Figure S3: Tabulation of reasons for remaining hesitant to recommend the COVID-19 vaccine to healthy adults according to proportion of participants who remained hesitant after message exposure.**

### Reasons cited by respondents who remained hesitant to recommend elderly according to proportion, % (n = 1,447)

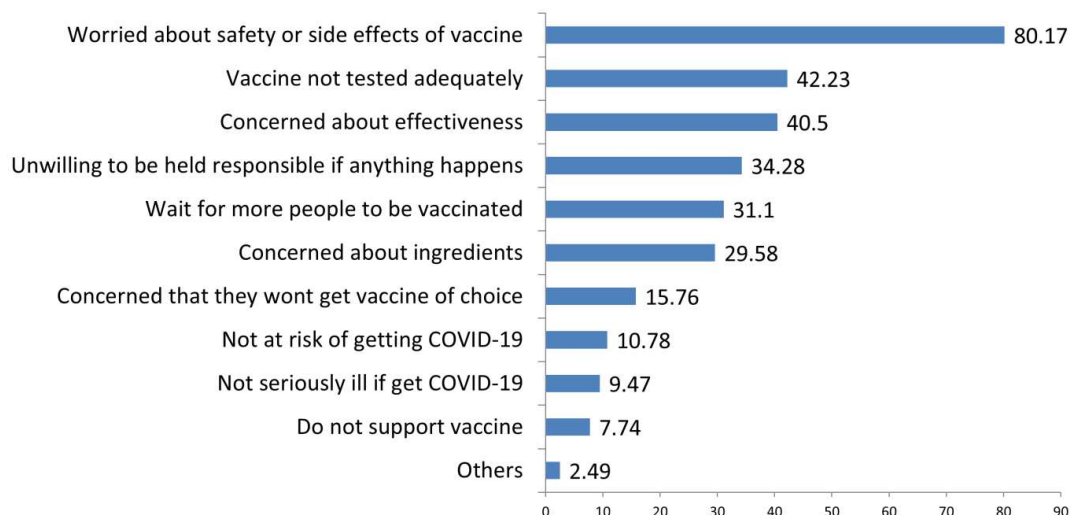

**Figure S4: Tabulation of reasons for remaining hesitant to recommend the COVID-19 vaccine to the elderly according to proportion of participants who remained hesitant after message exposure.**

### Proportion of respondents citing reason for vaccine recommendation hesitancy to family members with medical condition, % (n = 2,487)

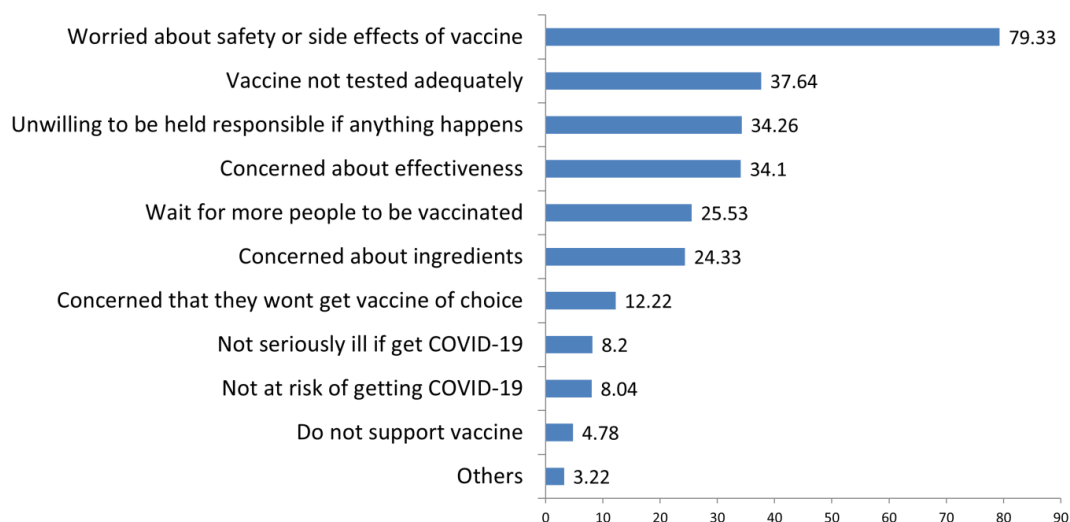

**Figure S5: Tabulation of reasons for remaining hesitant to recommend the COVID-19 vaccine to people with any pre-existing health conditions according to proportion of participants who remained hesitant after message exposure.**
